# Supplementary material for: INDEPENDENT STRATUM FORMATION ON THE AVIAN SEX CHROMOSOMES REVEALS INTER-CHROMOSOMAL GENE CONVERSION AND PREDOMINANCE OF PURIFYING SELECTION ON THE W CHROMOSOME
Source: PubMed Central journal article supplement (PMC4278454; doi:10.1111/evo.12493), 2014-08-29
Supplement: evo0068-3281-SD1.pdf [file evo0068-3281-SD1.pdf]

A.

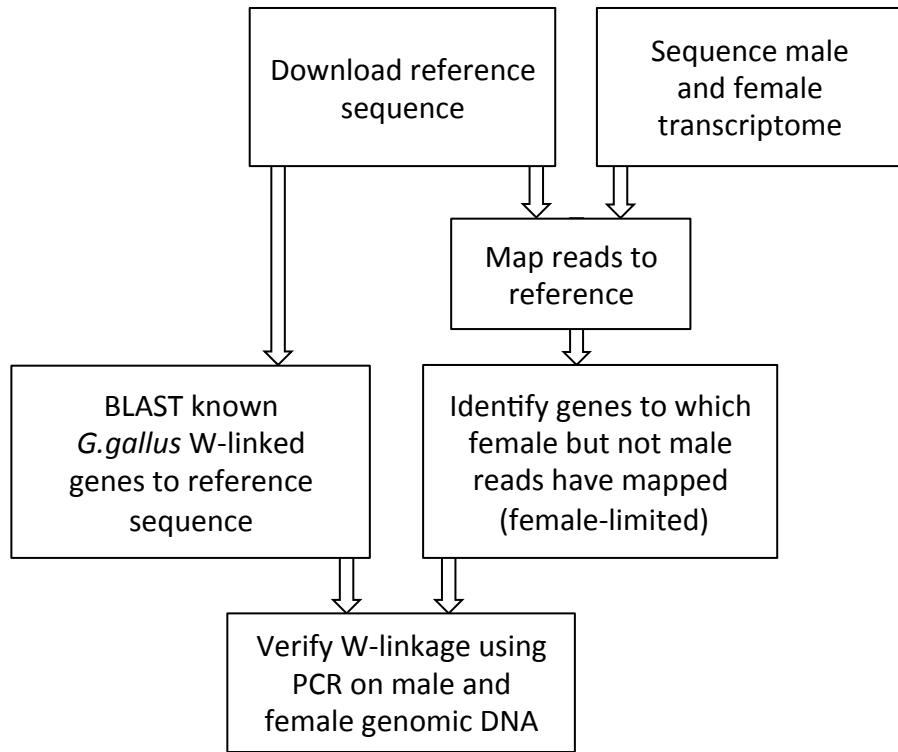

B.

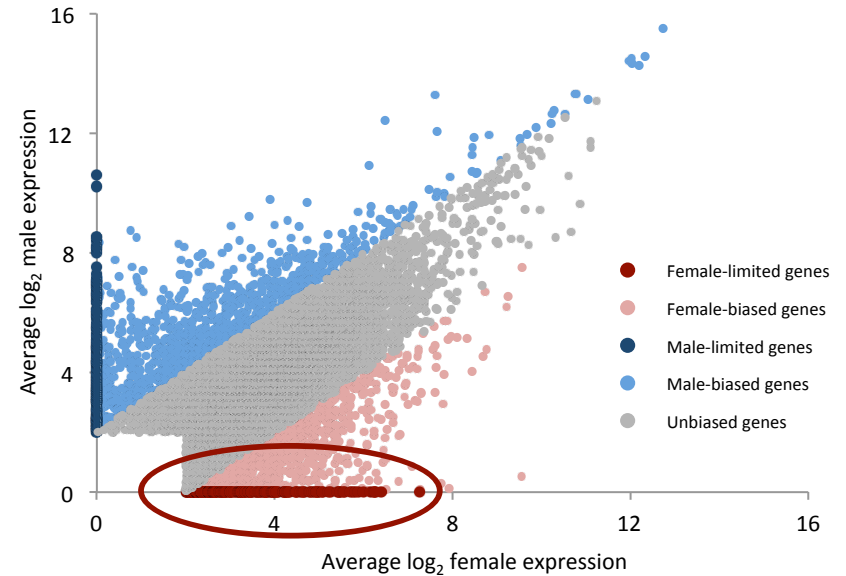

C.

Autosomal gene

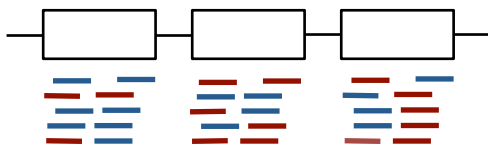

Z-linked gene

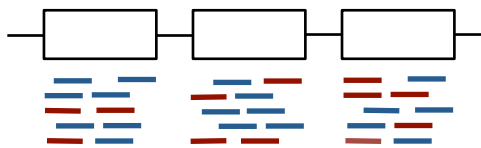

W-linked gene

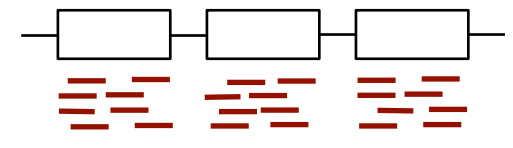

Male read

Female read
