# Supplementary material for: INDEPENDENT STRATUM FORMATION ON THE AVIAN SEX CHROMOSOMES REVEALS INTER-CHROMOSOMAL GENE CONVERSION AND PREDOMINANCE OF PURIFYING SELECTION ON THE W CHROMOSOME
Source: PubMed Central journal article supplement (PMC4278454; doi:10.1111/evo.12493), 2014-08-29

## Conserved Stratum I

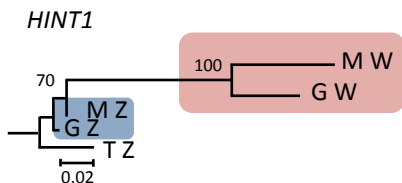

## Conserved Stratum II

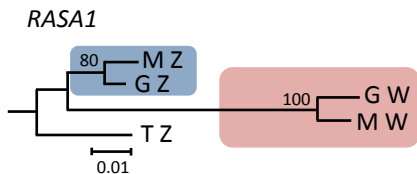

## Galliform-specific Stratum III

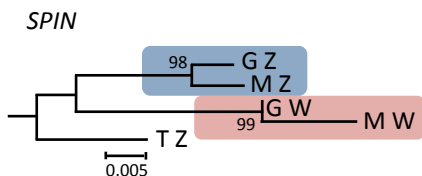

## Galliform-specific Stratum IV

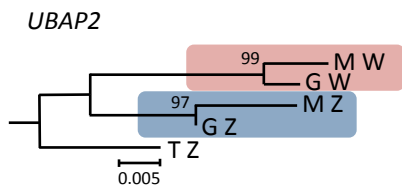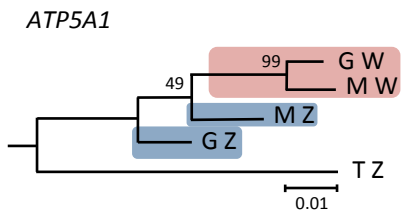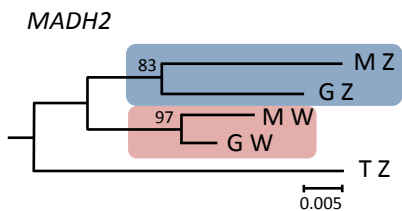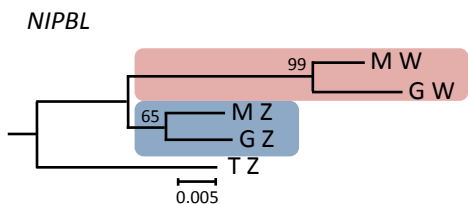

Supplement: evo0068-3281-SD2.pdf [file evo0068-3281-SD2.pdf]
