# Supplementary material for: INDEPENDENT STRATUM FORMATION ON THE AVIAN SEX CHROMOSOMES REVEALS INTER-CHROMOSOMAL GENE CONVERSION AND PREDOMINANCE OF PURIFYING SELECTION ON THE W CHROMOSOME
Source: PubMed Central journal article supplement (PMC4278454; doi:10.1111/evo.12493), 2014-08-29

## Conserved Stratum I

*CHD1*

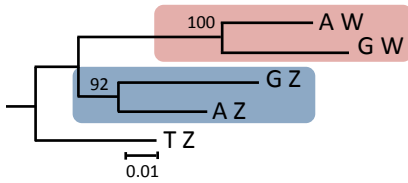

## Conserved Stratum II

*RASA1*

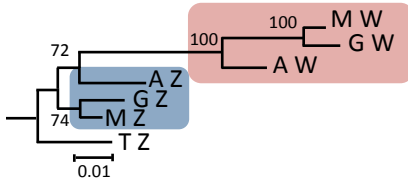

*KCMF1*

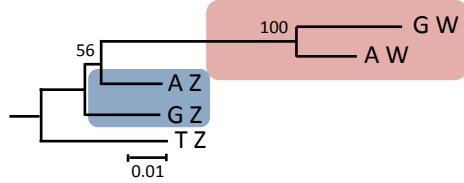

## Anseriform-specific Stratum III

*SPIN*

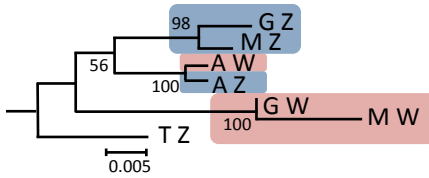

*VCP*

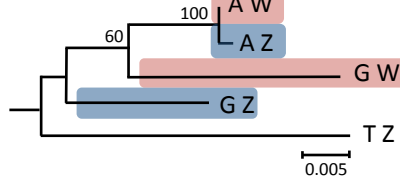

*ZSWIM6*

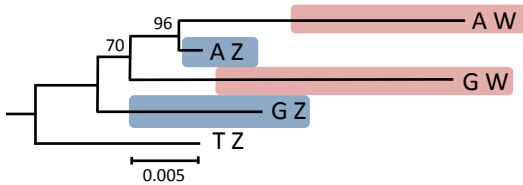

*UBE2R2*

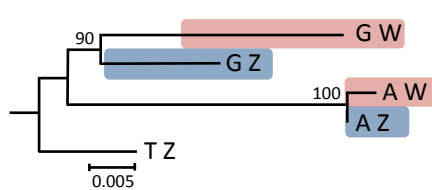

*HNRNPK*

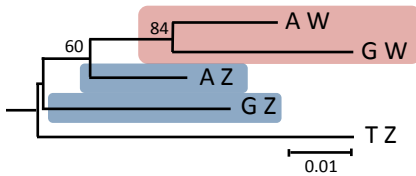

*NIPBL*

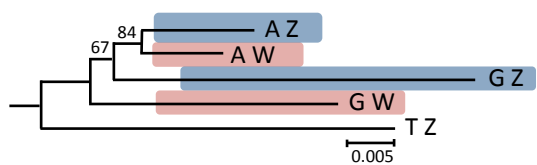

*MIER3*

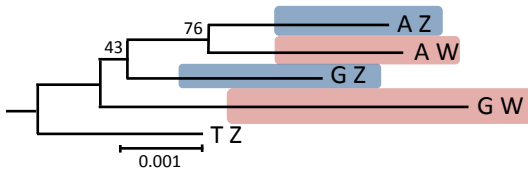

*ZFR*

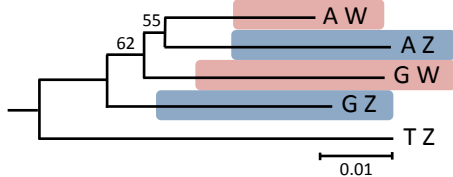

Supplement: evo0068-3281-SD3.pdf [file evo0068-3281-SD3.pdf]
